# Supplementary material for: Long-term follow-up of thalamic deep brain stimulation for essential tremor – patient satisfaction and mortality
Source: PubMed Central journal article supplement (PMC4052337; doi:10.1186/1471-2377-14-120), 2014-06-05
Supplement: 1471-2377-14-120-S1.pdf [file 1471-2377-14-120-S1.pdf]

## SPØRRESKJEMA FOR PASIENTER MED DYP HJERNESTIMULERING

Kontroller at data stemmer og sett kryss eller fyll inn:

NAVN:

FØDT:

OPERASJONSDATO:

### 1. YRKESSTATUS FØR 1. GANGS OPERASJON:

Yrke:

I full  
jobb

Ikke i fast  
arbeid

Delvis  
sykemeldt

ufør

alderspensionert

### 2. YRKESSTATUS RETT ETTER 1.GANGS OPERASJON

I full  
jobb

Ikke i fast  
arbeid

delvis  
sykemeldt

ufør

alderspensionert

### 3. YRKESSTATUS IDAG:

Samme yrke som før operasjon:

Ja

Nei

Nytt yrke:

I full  
jobb

Ikke i fast  
arbeid

delvis  
sykemeldt

ufør

alderspensionert

### 4.MEDIKAMENTBRUK FØR 1. GANGS OPERASJON

Nei:

Ja

Angi medikament/-er:

### 5.MEDIKAMENTBRUK RETT ETTER 1. GANGS OPERASJON

Nei:

Ja

Angi medikament/-er

**6. MEDIKAMETBRUK IDAG:** Nei Ja  
Angi medikament/-er:**7. ANDRE/ TIDLIGERE SYKDOMMER** epilepsi Angst lungekreft Annen  
kreft: depresjon

Type:

 astma Dupuytren's  
kontraktur  
(sammentrekning  
av sener i  
håndflaten) Grønn stær Grå stær

Annet:

 Født for tidlig  
- Hvor mye for tidlig:**8. LED DU AV DEPRESJON FØR OPERASJONEN**

Sett strek på linjen for hva som passer for deg for hvor deprimert du var før operasjonen. Der linjen går fra ikke deprimert til dypt deprimert.

Ikke  
deprimert

\_\_\_\_\_

Dypt  
deprimert**9. VAR DU DEPRIMERT RETT ETTER OPERASJON**

Sett strek på linjen for hva som passer for deg for hvor deprimert du var før operasjonen. Der linjen går fra ikke deprimert til dypt deprimert.

Ikke  
deprimert

\_\_\_\_\_

Dypt  
deprimert

### 10. ER DU DEPRIMERT IDAG

Sett strek på linjen for hva som passer for deg for hvor deprimert du var før operasjonen. Der linjen går fra ikke deprimert til dypt deprimert.

Ikke  
deprimert

\_\_\_\_\_

Dypt  
deprimert

### 11. LED DU AV ANGST FØR OPERASJONEN

Sett strek på linjen for hva som passer for deg for hvor mye du led av angst før operasjonen. Der linjen går fra ingen angst plager til invalidiserende angst.

Ingen  
angst

\_\_\_\_\_

invalidiserende  
angst

### 12. LED DU AV ANGST RETT ETTER OPERASJONEN

Sett strek på linjen for hva som passer for deg for hvor mye du led av angst etter operasjonen. Linjen går fra ingen angst plager til invalidiserende angst.

Ingen  
angst

\_\_\_\_\_

invalidiserende  
angst

### 13. LIDER DU AV ANGST IDAG

Sett strek på linjen for hva som passer for deg for hvor mye du led av angst før operasjonen.

Ingen  
angst

\_\_\_\_\_

invalidiserende  
angst

**14. BIVIRKINGER ETTER DYP HJERESTIMULERING**

- |                                              |                                               |                                          |
|----------------------------------------------|-----------------------------------------------|------------------------------------------|
| <input type="checkbox"/> Nummenhet/ prikking | <input type="checkbox"/> hodepine             | <input type="checkbox"/> smaksforandring |
| <input type="checkbox"/> taleproblemer       | <input type="checkbox"/> Ubehag på tungespiss | <input type="checkbox"/> svimmelhet      |
| <input type="checkbox"/> Annet:              |                                               |                                          |

**15. OPPLEVD EFFEKT AV DYP HJERNESTIMULATOR RETT ETTER 1.GANGS OPERASJON**

Sett en strek på linja etter hva som passer for deg fra ingen opplevd effekt til at alle plager ble borte.

Ingen effekt \_\_\_\_\_ alle plager borte

**16. OPPLEVD EFFEKT AV DBS STIMULATOR IDAG**

Sett en strek på linja etter hva som passer for deg fra ingen opplevd effekt til at alle plager ble borte.

Ingen effekt \_\_\_\_\_ alle plager borte

**17. HVIS EFFEKT HAR BLITT DÅRLIGERE:  
HVOR LENGE HADDE DU GOD EFFEKT AV OPERASJONEN?**

Angi antall år: \_\_\_\_\_

**18. HVOR TILFREDS ER DU IDAG MED Å HA GJENNOMFØRT DYP HJERNESTIMULERING**

Sett en strek på linja etter hvor tilfreds du er med å ha gjennomført dyp hjernestimulering der linja går fra svært misfornøyd til svært fornøyd.

Svært misfornøyd \_\_\_\_\_ svært fornøyd

**EVENTUELLE KOMMENTARER TIL SPØRSMÅL 18**

**GENERELLE KOMMENTARER:**
